# Supplementary material
Source: Springer Nature journal article supplement (https://www.springermedizin.de/resource/supplementary/12881_2013_1159_MOESM1_ESM.pdf/9452104)
Supplement: MOESM1 [file 9452104]

**Table S1A - Characteristics of German subjects**

|                                      | with genotype data                                | without genotype data                              |       |
|--------------------------------------|---------------------------------------------------|----------------------------------------------------|-------|
| <b>German patients with IIPs</b>     |                                                   |                                                    |       |
| Number of the subjects               | 102                                               | 36                                                 |       |
| Age (years)                          | 67.3 ± 1.0                                        | 67.7 ± 1.6                                         | 0.986 |
| Gender (male / female)               | 64 (62.7%) / 38 (37.3%)                           | 24 (66.7%) / 12 (33.3%)                            | 0.674 |
| Smoking (Cu / Ex / Non / ND)         | 10 (9.8%) / 35 (34.3%) /<br>51 (50.0%) / 6 (5.9%) | 4 (11.1%) / 19 (52.8%) /<br>13 (36.1%) / 0 (0.0%)  | 0.194 |
| VC (percent predicted)               | 69.4 ± 2.2                                        | 72.8 ± 2.8                                         | 0.036 |
| DL <sub>CO</sub> (percent predicted) | 47.1 ± 2.1                                        | 49.4 ± 2.5                                         | 0.316 |
| Diagnostic category (IPF / NSIP)     | 71 (69.6%) / 31 (30.4%)                           | 23 (63.9%) / 13 (36.1%)                            | 0.527 |
| Serum SP-A (ng/ml)                   | 79.5 ± 3.3                                        | 79.0 ± 8.5                                         | 0.253 |
| Serum SP-D (ng/ml)                   | 376.0 ± 23.2                                      | 365.4 ± 42.2                                       | 0.466 |
| <b>German Healthy subjects</b>       |                                                   |                                                    |       |
| Number of the subjects               | 37                                                | 128                                                |       |
| Age (years)                          | 42.9 ± 2.3                                        | 34.7 ± 0.9                                         | 0.001 |
| Gender (male / female)               | 17 (45.9%) / 20 (54.1%)                           | 43 (33.6%) / 85 (66.4%)                            | 0.169 |
| Smoking (Cu / Ex / Non / ND)         | 4 (10.8%) / 2 (5.4%) /<br>17 (45.9%) / 14 (37.9%) | 37 (28.9%) / 18 (14.1%) /<br>73 (57.0%) / 0 (0.0%) | 0.315 |
| Serum SP-A (ng/ml)                   | 31.1 ± 2.9                                        | 29.3 ± 1.2                                         | 0.942 |
| Serum SP-D (ng/ml)                   | 62.2 ± 8.6                                        | 59.1 ± 2.2                                         | 0.443 |

**Table S1B - Characteristics of Japanese subjects**

|                                      | with genotype data                                  | without genotype data                            |       |
|--------------------------------------|-----------------------------------------------------|--------------------------------------------------|-------|
| <b>Japanese patients with IIPs</b>   |                                                     |                                                  |       |
| Number of the subjects               | 63                                                  | 31                                               |       |
| Age (years)                          | 67.8 ± 1.3                                          | 68.3 ± 1.3                                       | 0.961 |
| Gender (male / female)               | 43 (68.3%) / 20 (31.7%)                             | 21 (67.7%) / 10 (32.3%)                          | 0.960 |
| Smoking (Cu / Ex / Non / ND)         | 10 (15.9%) / 30 (47.6%) /<br>23 (36.5%) / 0 (0.0%)  | 1 (3.2%) / 16 (51.6%) /<br>12 (38.7%) / 2 (6.5%) | 0.233 |
| VC (percent predicted)               | 73.2 ± 2.6                                          | 67.0 ± 4.9                                       | 0.101 |
| DL <sub>CO</sub> (percent predicted) | 45.2 ± 2.1                                          | 43.8 ± 3.0                                       | 0.912 |
| Diagnostic category (IPF / NSIP)     | 37 (58.7%) / 26 (41.3%)                             | 24 (77.4%) / 7 (22.6%)                           | 0.074 |
| Serum SP-A (ng/ml)                   | 78.7 ± 6.6                                          | 91.8 ± 13.8                                      | 0.442 |
| Serum SP-D (ng/ml)                   | 308.6 ± 42.8                                        | 331.4 ± 39.3                                     | 0.955 |
| <b>Japanese Healthy subjects</b>     |                                                     |                                                  |       |
| Number of the subjects               | 275                                                 | 0                                                |       |
| Age (years)                          | 49.8 ± 0.4                                          | NA                                               |       |
| Gender (male / female)               | 227 (82.5%) / 48 (17.5%)                            | NA                                               |       |
| Smoking (Cu / Ex / Non / ND)         | 82 (29.8%) / 62 (22.6%) /<br>131 (47.6%) / 0 (0.0%) | NA                                               |       |
| Serum SP-A (ng/ml)                   | 29.4 ± 0.9                                          | NA                                               |       |
| Serum SP-D (ng/ml)                   | 39.9 ± 1.6                                          | NA                                               |       |

Data are shown as mean ± SEM.

Statistical significance was tested by Mann–Whitney *U*-test or Chi-square test.

Cu, current smoker; Ex, ex-smoker; Non, non-smoker; ND, no data; NA, not available, IIPs, idiopathic interstitial pneumonias; VC, vital capacity;  $DL_{CO}$ , diffusing capacity of the lung for carbon monoxide; IPF, idiopathic pulmonary fibrosis; NSIP, nonspecific interstitial pneumonia.
